# Supplementary material for: Stability of YSZ and SDC in molten carbonate eutectics for hybrid direct carbon fuel cells
Source: Royal Society of Chemistry journal article supplement (doi:10.1039/c3ra46600k), 2013-11-25
Supplement: c3ra46600k.pdf [file c3ra46600k.pdf]

## Stability of YSZ and SDC in molten carbonate eutectics for hybrid direct carbon fuel cells

Xiaoyong Xu, Wei Zhou\* and Zhonghua Zhu\*

*School of Chemical Engineering, The University of Queensland, St Lucia, Queensland, 4072, Australia*

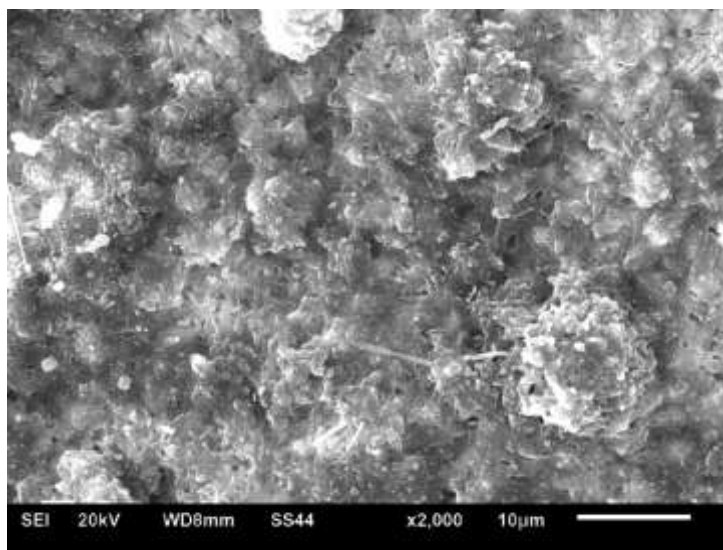

**Fig. S1** SDC surface tested by molten carbonate in hydrogen at 700 °C for 24 hours and cleaned by diluted nitric acid
